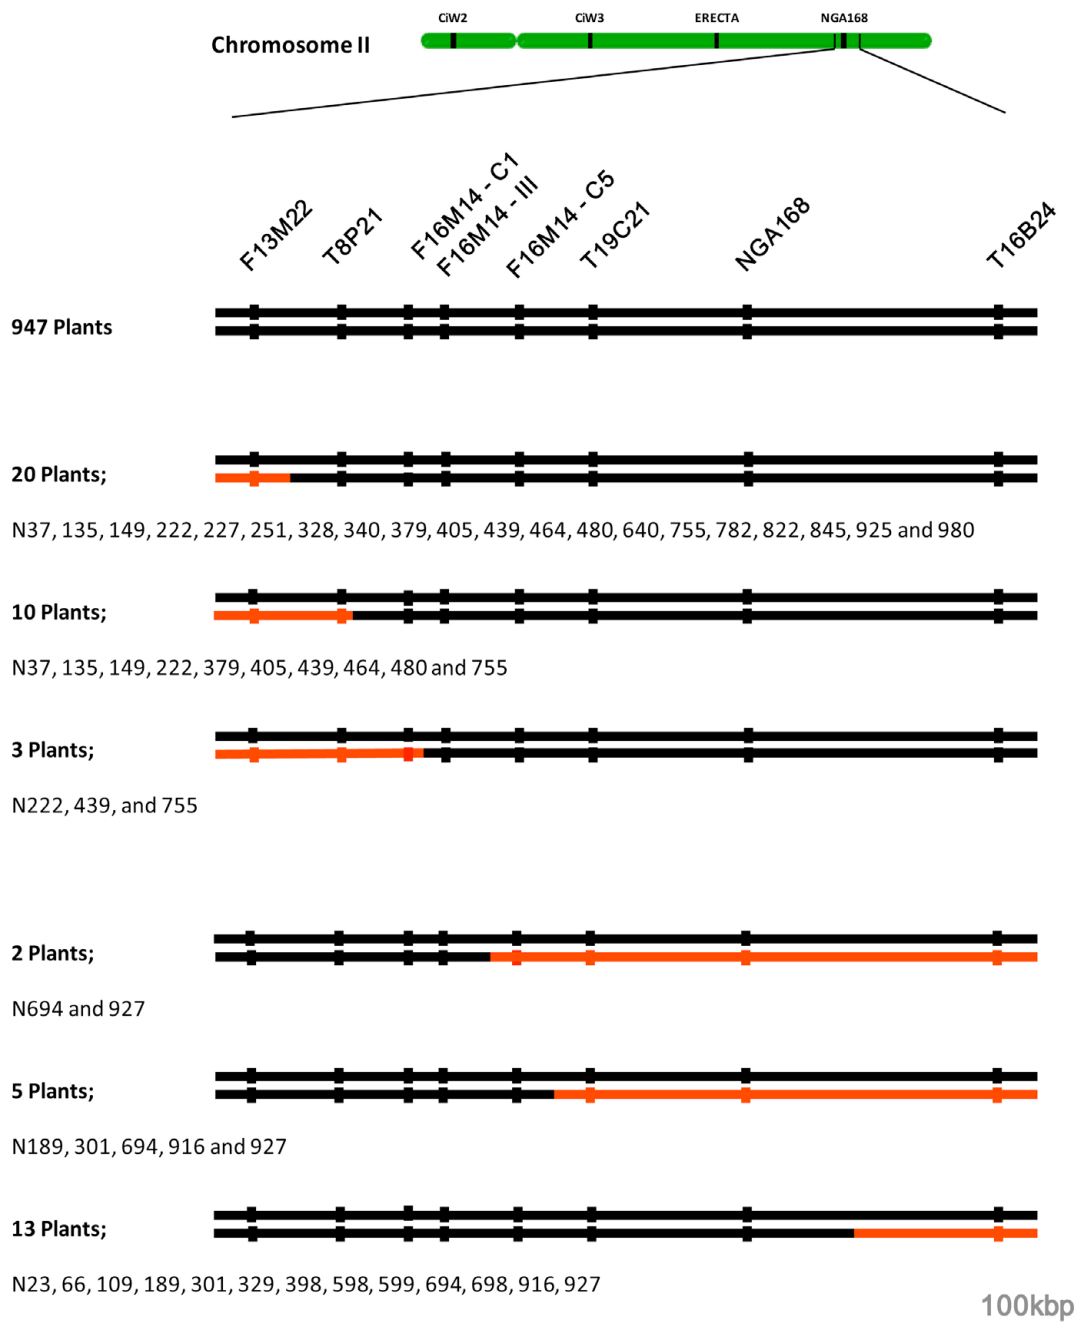

**Fig. S1. Fine scale mapping of the *NOP* locus.** 990 *ptl nop-1* mutant F2 plants from a cross between *ptl-3 pmd-1d nop-1 er* (in *Ler* background) and *ptl-1 PMD NOP ER* (in *Col* background) were scored for DNA markers on chromosome 2 lying between F13M22 and T16B24. The strand diagrams show the deduced two chromosomes of 43 plants with recombination detected in this interval (black represents the *Ler* derived strand; red represents the *Col*-derived strand). The *NOP* locus must lie between DNA markers F16M14-C1 and F16M14-C5.

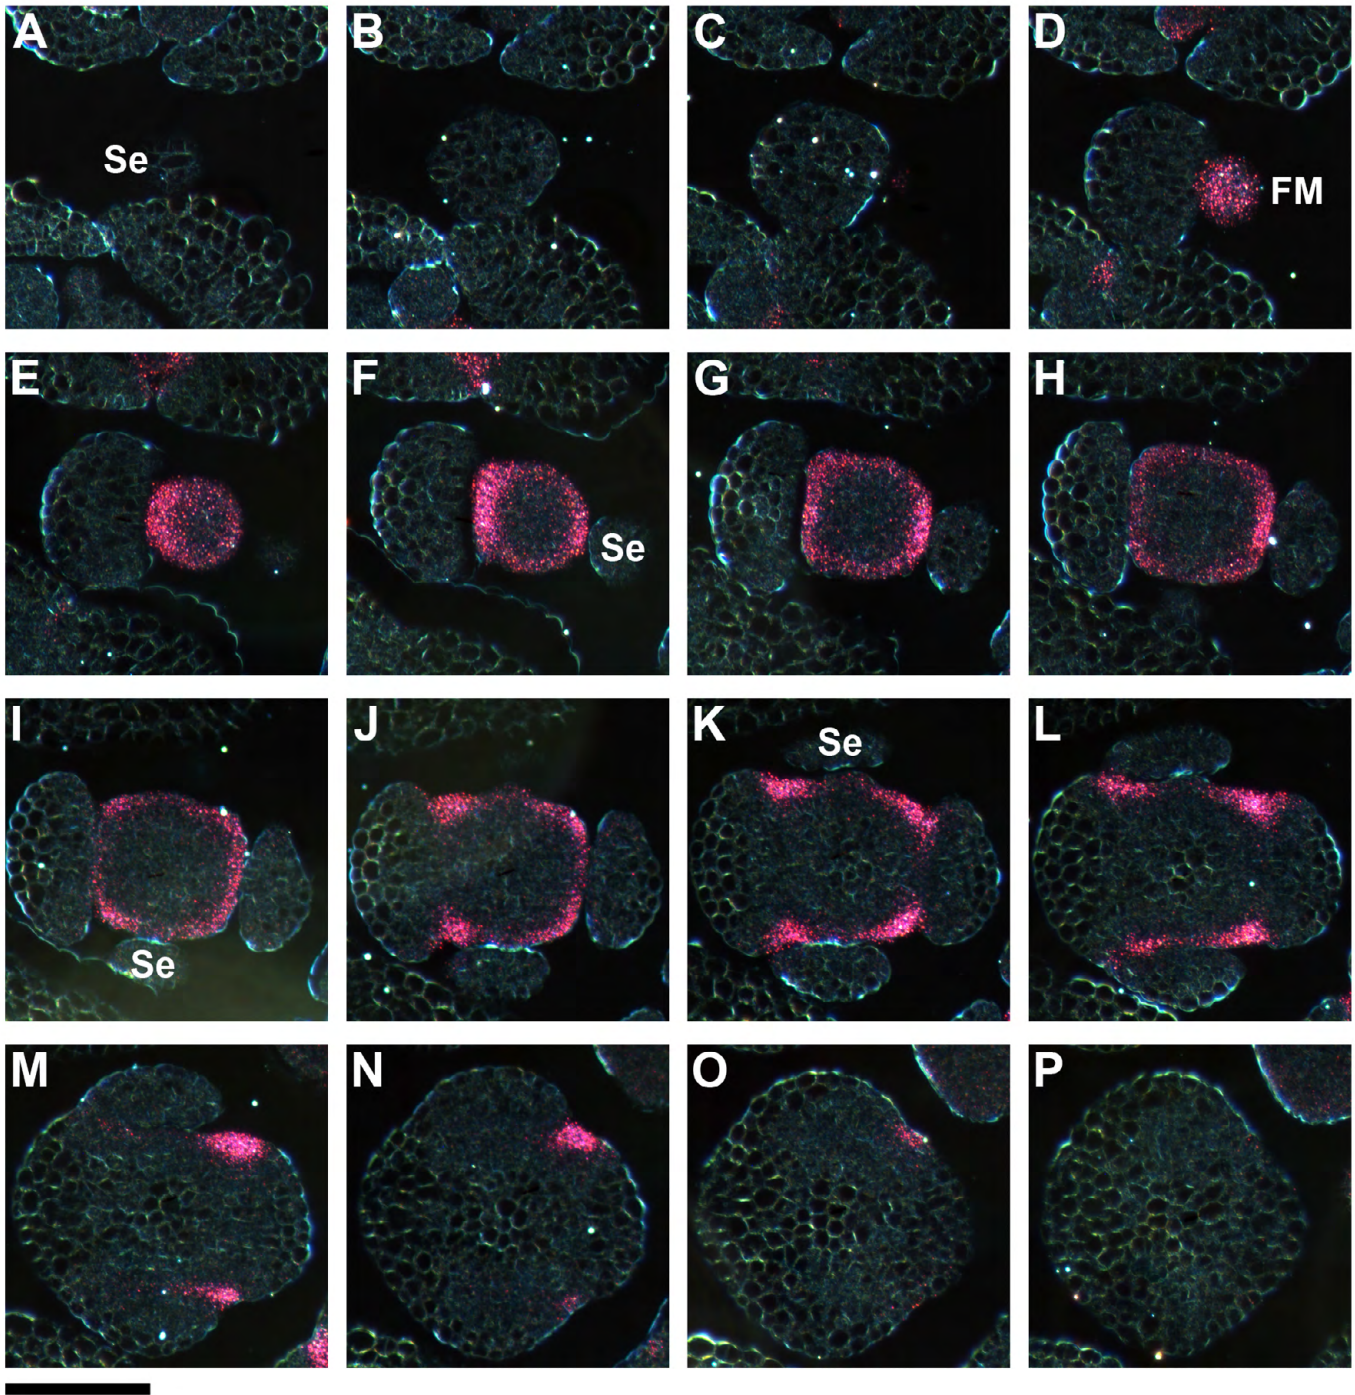

**Fig. S2. pAUX1:GUS expression in serial transverse sections of a wild-type stage 4 bud.** (A-P) Strong *AUX1* expression occurs in the epidermis of the floral meristematic dome (FM) and the inter-sepal zones (Se, sepals). (L) This panel is shown in Fig. 2. Scale bar: 50  $\mu$ m.

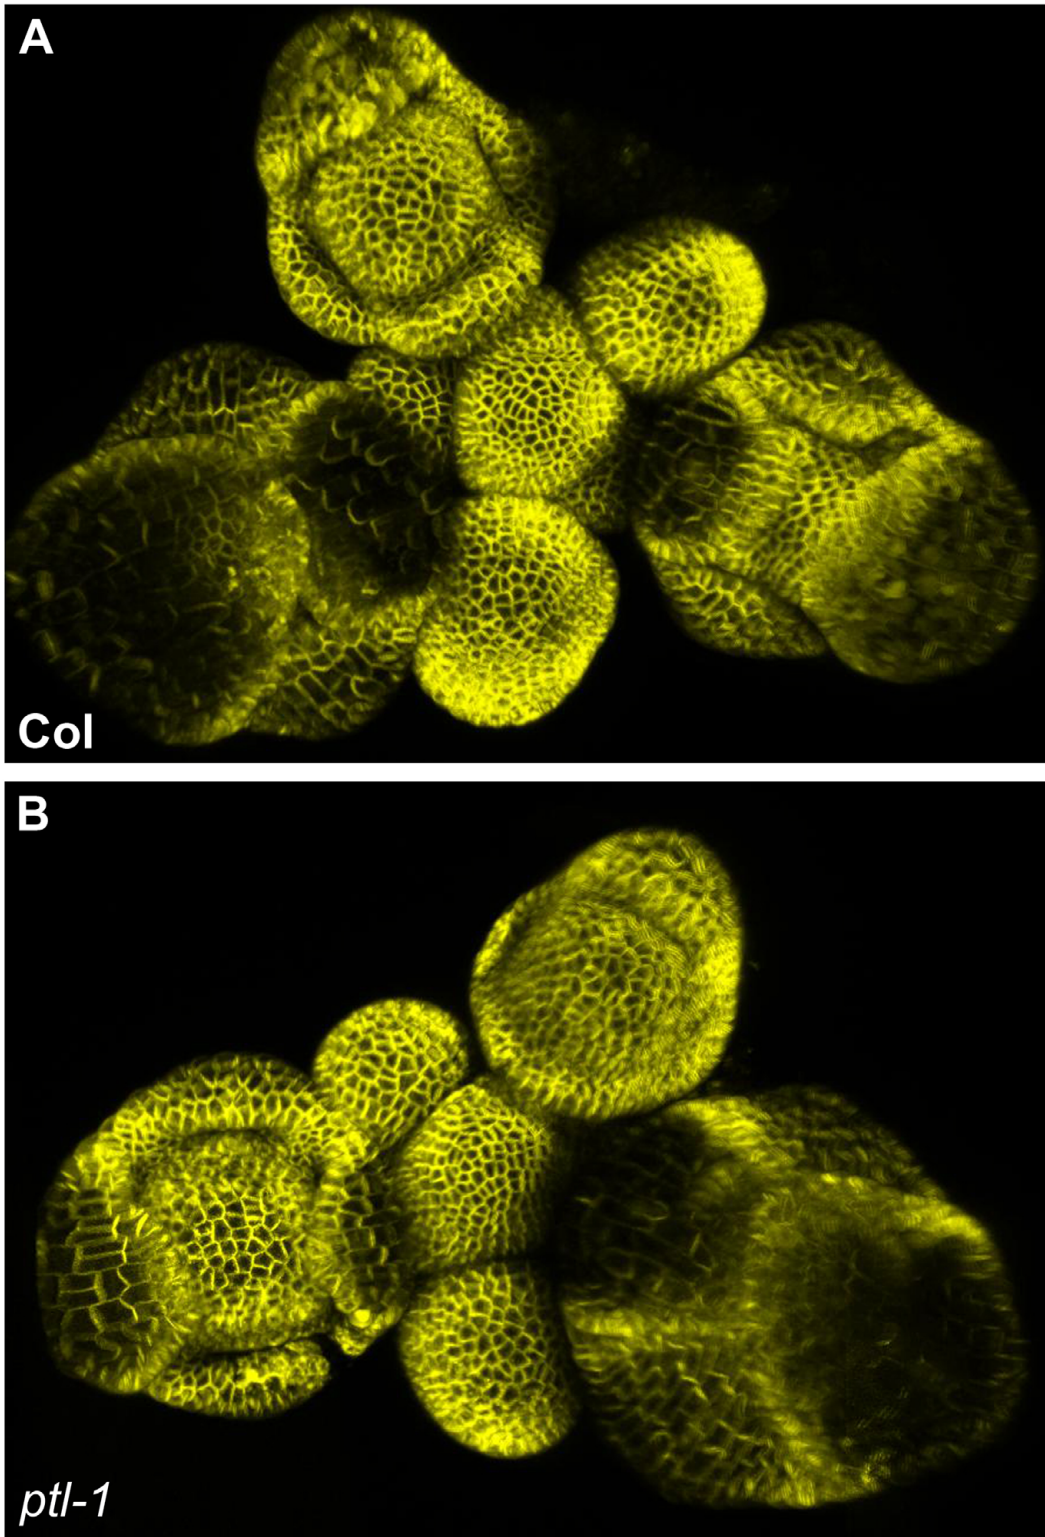

**Fig. S3. pPIN1:PIN1-GFP expression in wild type and *ptl-1* mutant inflorescences.** (A) Columbia wild type inflorescence. (B) *ptl-1* mutant inflorescence.

**Table S1. DNA primers used**

(A) For allele identification

| Gene | Primer       | Sequence                        | Restriction enzyme | Product size (bp) |          |
|------|--------------|---------------------------------|--------------------|-------------------|----------|
|      |              |                                 |                    |                   |          |
| AUX1 | A25F         | 5'-TCTTTCTTGTAGAATGCGGCG-3'     | Sau3AI             | AUX1              | aux1-7   |
|      | A26R         | 5'-TCAAAGACGGTGGTGTAAAGC-3'     |                    | 246               | 84, 162  |
|      | A48F+600     | 5'-CATTTAATTGCACTTTCCTCTTGTT-3' | ApaI               | AUX1              | aux1-21  |
|      | A49R+1043    | 5'-CATATACTGTCACTCAATGCAAAG-3'  |                    | 443               | 220, 223 |
|      | A18F         | 5'-AGCTTTGGATTTTGTCCATTAC-3'    | TaqI               | AUX1              | aux1-n1  |
|      | A50+3206R    | 5'-ACTTGACGAACAAAGTTGGTTACA-3'  |                    | 250               | 39, 211  |
| AXR4 | axr4-144F    | 5'-AAACACGCTCCTTGAATGATG-3'     | -                  | AXR4              | axr4-1,2 |
|      | axr4-2147R   | 5'-TCCCAAAGAAAAATCTCAAAA-3'     |                    | 2,291             | -        |
| LAX1 | lx1-1        | 5'-ATATGGTTGCAGGTGGCACA-3'      | -                  | LAX1              | lax1-1   |
|      | lx1-2        | 5'-GTAACCGGCAAAAGCTGCA-3'       |                    | 1,193             | -        |
| LAX2 | lx2-3        | 5'-ACAGCTGGGGATGCTCTCA-3'       | -                  | LAX2              | lax2-1   |
|      | lx2-4        | 5'-TCAGCACGTAGAGTGTGCA-3'       |                    | 1,193             | -        |
| LAX3 | lx3-1        | 5'-TACTTCACCGGAGCCACCA-3'       | -                  | LAX3              | lax3-1   |
|      | lx3-2R       | 5'-ACTTAGAAATGGAGAGGGAAGA-3'    |                    | 1,043             | -        |
| PTL  | ptl-30F P1   | 5'-TCTCTTTCGGCTGAATATAAATCTG-3' | HaeIII             | PTL               | ptl-1    |
|      | ptl+498R P1  | 5'-ATTAGGGTAAAATCGAGAGAGGAGA-3' |                    | 138, 390          | 528      |
|      | ptl+1624 P3  | 5'-GAAGAAATGCAGAGAGAAGTTTGAG-3' | -                  | PTL               | ptl-3    |
|      | ptl+2315R P3 | 5'-ATTGTTTCGGATCTCATTATTACCA-3' |                    | 691               | 599      |
| RBE  | rbe+74F      | 5'-CTTTATTTGGCCGTTTAGGG-3'      | -                  | RBE               | rbe-2    |
|      | rbe+1105R    | 5'-GGAGTTCACATGGAATACCAGAC-3'   |                    | 1,031             | 959      |
|      | Lbb1.3       | 5'-ATTTTGCCGATTCGGAAC-3'        |                    |                   |          |

(B) For insert generation

| Construct         | Primer       | Sequence*                             | Substrate | Size (bp) |
|-------------------|--------------|---------------------------------------|-----------|-----------|
| pPTL(FI313):iaaH  | iaah-bamhi-F | 5'-ttaggatccATGGTGGCCATTACCTCGTTA-3'  | TOPO-iaaH | 1,404     |
|                   | iaah-xbai-R  | 5'-atgtctagaTTAATTGGGTAAACCGGC AAA-3' |           |           |
| pPTL(FI313):AUX1  | aux1-bamhi-F | 5'-agcggatccATGTCGGAAGGAGTAGAAGCG-3'  | F16M14    | 4,188     |
|                   | aux1-ncoi-R  | 5'-tgccatggTCAAAGACGGTGGTGTAAAGC-3'   |           |           |
| pAUX1(3.67bp):GUS | A33F-3770    | 5'-TGTTTCATAGTGCGCATGTTTC-3'          | F16M14    | 3,770     |
|                   | Am32R+7      | 5'-CCGggATcTTTTAGCTTCTAGATCTGAG-3'    |           |           |

\*Lower case represents added restriction sites

(C) For confirmation of inserts in T1 plants

| <b>Construct</b>  | <b>Primer</b> | <b>Sequence</b>                   |
|-------------------|---------------|-----------------------------------|
| pPTL(FI313):iaaH  | ptl-30F P1    | 5'-TCTCTTTTCGGCTGAATATAAAATCTG-3' |
|                   | 3'OCSR        | 5'-CATGCGATCATAGGCGTCTC-3'        |
| pPTL(FI313):AUX1  | ptl-30F P1    | 5'-TCTCTTTTCGGCTGAATATAAAATCTG-3' |
|                   | A49R+1043     | 5'-CATATACTGTACCTCAATGCAAAG-3'    |
| pAUX1(3.67bp):GUS | A01F-525      | 5'-AAAGGAGGAGTAGGGGTGA-3'         |
|                   | GUS84R        | 5'-ACAGTTTTTCGCGATCCAGAC-3'       |
|                   |               |                                   |

**Table S2. Mean number of floral organs per flower in single and double mutant combinations of *ptl-3* and *nop-1* (*aux1-n1*) or *nop-2* (*aux1-n2*)**

|                                | Mean number of organs per flower $\pm$ s.e.m. |                 |                 |                 |
|--------------------------------|-----------------------------------------------|-----------------|-----------------|-----------------|
|                                | Sepals                                        | Petals          | Stamens         | Carpels         |
| <b>Ler n=72</b>                | 4.00 $\pm$ 0.00                               | 4.00 $\pm$ 0.00 | 6.00 $\pm$ 0.00 | 2.00 $\pm$ 0.00 |
| <b><i>nop-1</i> n=72</b>       | 4.00 $\pm$ 0.00                               | 3.93 $\pm$ 0.03 | 6.00 $\pm$ 0.00 | 2.00 $\pm$ 0.00 |
| <b><i>nop-2</i> n=72</b>       | 4.00 $\pm$ 0.00                               | 3.82 $\pm$ 0.05 | 5.86 $\pm$ 0.06 | 2.00 $\pm$ 0.06 |
| <b><i>ptl-3</i> n=48</b>       | 4.01 $\pm$ 0.01                               | 6.29 $\pm$ 0.18 | 6.01 $\pm$ 0.01 | 2.00 $\pm$ 0.01 |
| <b><i>ptl-3 nop-1</i> n=72</b> | 4.00 $\pm$ 0.00                               | 0.44 $\pm$ 0.09 | 5.97 $\pm$ 0.03 | 2.00 $\pm$ 0.03 |
| <b><i>ptl-3 nop-2</i> n=72</b> | 3.89 $\pm$ 0.05                               | 0.11 $\pm$ 0.04 | 5.83 $\pm$ 0.07 | 2.00 $\pm$ 0.07 |

The first six flowers of the indicated number of plants (*n*) were scored.

**Table S3. Mean number of floral organs per flower in single and double mutant combinations of *ptl-1* and *aux1-7* or *aux1-21***

|                                  | Mean number organs per flower $\pm$ s.e.m. |                 |                 |                 |
|----------------------------------|--------------------------------------------|-----------------|-----------------|-----------------|
|                                  | Sepals                                     | Petals          | Stamens         | Carpels         |
| <b>Col n=60</b>                  | 4.00 $\pm$ 0.00                            | 4.00 $\pm$ 0.00 | 6.00 $\pm$ 0.00 | 2.00 $\pm$ 0.00 |
| <b><i>aux1-7</i> n=60</b>        | 4.00 $\pm$ 0.00                            | 3.93 $\pm$ 0.03 | 5.88 $\pm$ 0.06 | 2.00 $\pm$ 0.00 |
| <b><i>aux1-21</i> n=72</b>       | 3.92 $\pm$ 0.04                            | 3.79 $\pm$ 0.05 | 5.81 $\pm$ 0.07 | 2.00 $\pm$ 0.00 |
| <b><i>ptl-1</i> n=60</b>         | 4.00 $\pm$ 0.00                            | 2.30 $\pm$ 0.11 | 6.00 $\pm$ 0.00 | 2.00 $\pm$ 0.00 |
| <b><i>ptl-1 aux1-7</i> n=72</b>  | 4.00 $\pm$ 0.00                            | 0.11 $\pm$ 0.04 | 5.82 $\pm$ 0.06 | 2.00 $\pm$ 0.00 |
| <b><i>ptl-1 aux1-21</i> n=72</b> | 3.89 $\pm$ 0.04                            | 0.00 $\pm$ 0.00 | 5.85 $\pm$ 0.06 | 2.00 $\pm$ 0.00 |

The first six flowers of the indicated number of plants (*n*) were scored.

**Table S4. Mean number of floral organs per flower in single and multiple mutant combinations of *aux1-21*, *lax1-1*, *lax2-1* and *lax3-1***

|                                           | Mean number organs per flower $\pm$ s.e.m. |                 |                 |                 |
|-------------------------------------------|--------------------------------------------|-----------------|-----------------|-----------------|
|                                           | Sepals                                     | Petals          | Stamens         | Carpels         |
| <b>Col n=72</b>                           | 4.00 $\pm$ 0.00                            | 3.99 $\pm$ 0.01 | 6.00 $\pm$ 0.00 | 2.00 $\pm$ 0.00 |
| <b><i>aux1-21</i> n=119</b>               | 4.00 $\pm$ 0.00                            | 3.98 $\pm$ 0.01 | 5.79 $\pm$ 0.05 | 2.00 $\pm$ 0.00 |
| <b><i>lax1</i> n=84</b>                   | 4.00 $\pm$ 0.00                            | 4.00 $\pm$ 0.00 | 5.86 $\pm$ 0.05 | 2.00 $\pm$ 0.00 |
| <b><i>lax2</i> n=72</b>                   | 4.00 $\pm$ 0.00                            | 4.00 $\pm$ 0.00 | 6.00 $\pm$ 0.00 | 2.00 $\pm$ 0.00 |
| <b><i>lax3</i> n=72</b>                   | 4.00 $\pm$ 0.00                            | 4.00 $\pm$ 0.00 | 6.00 $\pm$ 0.00 | 2.00 $\pm$ 0.00 |
| <b><i>aux1-21 lax1</i> n=95</b>           | 4.00 $\pm$ 0.00                            | 3.72 $\pm$ 0.06 | 4.84 $\pm$ 0.12 | 2.00 $\pm$ 0.00 |
| <b><i>aux1-21 lax2</i> n=71</b>           | 4.00 $\pm$ 0.00                            | 3.94 $\pm$ 0.03 | 5.63 $\pm$ 0.08 | 2.00 $\pm$ 0.00 |
| <b><i>aux1-21 lax3</i> n=72</b>           | 4.00 $\pm$ 0.00                            | 3.97 $\pm$ 0.02 | 5.51 $\pm$ 0.09 | 2.00 $\pm$ 0.00 |
| <b><i>aux1-21 lax2 lax3</i> n=72</b>      | 4.00 $\pm$ 0.00                            | 3.96 $\pm$ 0.03 | 5.63 $\pm$ 0.09 | 2.00 $\pm$ 0.00 |
| <b><i>aux1-21 lax1 lax2</i> n=59</b>      | 4.00 $\pm$ 0.00                            | 3.63 $\pm$ 0.10 | 4.17 $\pm$ 0.18 | 2.00 $\pm$ 0.00 |
| <b><i>aux1-21 lax1 lax3</i> n=54</b>      | 4.00 $\pm$ 0.00                            | 3.70 $\pm$ 0.07 | 4.53 $\pm$ 0.16 | 2.00 $\pm$ 0.00 |
| <b><i>aux1-21 lax ;lax2 lax3</i> n=60</b> | 3.90 $\pm$ 0.06                            | 3.65 $\pm$ 0.09 | 4.34 $\pm$ 0.17 | 2.00 $\pm$ 0.00 |

The first six flowers of the indicated number of plants (*n*) were scored.



**Table S5. Restoration of petals in *ptl* mutant plants by a pPTL:iaaH transgene**

| Genotype     | Construct        | Number of independent lines | Mean number of organs per flower $\pm$ s.e.m. |                 |                 |                 |
|--------------|------------------|-----------------------------|-----------------------------------------------|-----------------|-----------------|-----------------|
|              |                  |                             | Sepals                                        | Petals          | Stamens         | Carpels         |
| Col          | Nil              | 10                          | 4.00 $\pm$ 0.00                               | 4.00 $\pm$ 0.00 | 6.00 $\pm$ 0.00 | 2.00 $\pm$ 0.00 |
| Col          | pPTL(FI313):iaaH | 10                          | 4.00 $\pm$ 0.00                               | 4.01 $\pm$ 0.01 | 5.96 $\pm$ 0.02 | 2.00 $\pm$ 0.00 |
| <i>ptl-1</i> | Nil              | 10                          | 4.00 $\pm$ 0.00                               | 1.45 $\pm$ 0.11 | 5.99 $\pm$ 0.01 | 2.00 $\pm$ 0.00 |
| <i>ptl-1</i> | pPTL(FI313):iaaH | 7                           | 4.00 $\pm$ 0.00                               | 3.33 $\pm$ 0.10 | 5.93 $\pm$ 0.04 | 2.00 $\pm$ 0.00 |

The mean number of floral organs per flower in flowers 1-12 of T1 plants carrying the pPTL(FI313):iaaH transgene in either Col or *ptl-1* are shown. Controls without the transgene are also shown.

**Table S6. Restoration of petals in *ptl aux1* mutant plants by a pPTL:AUX1 transgene**

| Genotype             | Construct        | Number of independent lines | Mean number organs per flower $\pm$ s.e.m |                 |                 |                 |
|----------------------|------------------|-----------------------------|-------------------------------------------|-----------------|-----------------|-----------------|
|                      |                  |                             | Sepals                                    | Petals          | Stamens         | Carpels         |
| Col                  | Nil              | 10                          | 4.00 $\pm$ 0.00                           | 4.00 $\pm$ 0.00 | 6.00 $\pm$ 0.00 | 2.00 $\pm$ 0.00 |
| Col                  | pPTL(FI313):AUX1 | 7                           | 4.00 $\pm$ 0.00                           | 4.00 $\pm$ 0.00 | 6.00 $\pm$ 0.00 | 2.00 $\pm$ 0.00 |
| <i>ptl-1</i>         | Nil              | 10                          | 4.00 $\pm$ 0.00                           | 1.45 $\pm$ 0.11 | 5.99 $\pm$ 0.01 | 2.00 $\pm$ 0.00 |
| <i>ptl-1 aux1-7</i>  | Nil              | 10                          | 4.00 $\pm$ 0.00                           | 0.07 $\pm$ 0.02 | 5.99 $\pm$ 0.01 | 2.00 $\pm$ 0.00 |
| <i>ptl-1 aux1-7</i>  | pPTL(FI313):AUX1 | 9                           | 4.02 $\pm$ 0.01                           | 0.99 $\pm$ 0.10 | 5.99 $\pm$ 0.01 | 2.00 $\pm$ 0.00 |
| Ler                  | Nil              | 10                          | 4.02 $\pm$ 0.01                           | 4.01 $\pm$ 0.01 | 6.00 $\pm$ 0.00 | 2.00 $\pm$ 0.00 |
| Ler                  | pPTL(FI313):AUX1 | 7                           | 4.01 $\pm$ 0.01                           | 4.01 $\pm$ 0.01 | 6.00 $\pm$ 0.00 | 2.00 $\pm$ 0.00 |
| <i>ptl-3</i>         | Nil              | 10                          | 4.02 $\pm$ 0.01                           | 5.36 $\pm$ 0.15 | 5.95 $\pm$ 0.03 | 2.00 $\pm$ 0.00 |
| <i>ptl-3 aux1-n1</i> | Nil              | 10                          | 4.01 $\pm$ 0.01                           | 0.23 $\pm$ 0.04 | 5.93 $\pm$ 0.03 | 2.00 $\pm$ 0.00 |
| <i>ptl-3 aux1-n1</i> | pPTL(FI313):AUX1 | 12                          | 4.01 $\pm$ 0.01                           | 2.05 $\pm$ 0.15 | 5.97 $\pm$ 0.02 | 2.00 $\pm$ 0.00 |

The mean number of floral organs per flower in flowers 1-12 of T1 plants carrying the pPTL(FI313):AUX1 transgene in either Col or *ptl-1 aux1-7*, and in either Ler or *ptl-3 aux1-n1*, are shown. Controls without the transgene are also shown.

**Table S7. Mean number of floral organs per flower in single and double mutant combinations of *ptl-1* and *axr4-1* or *axr4-2***

|                                 | Mean number organs per flower $\pm$ s.e.m. |                 |                 |                 |
|---------------------------------|--------------------------------------------|-----------------|-----------------|-----------------|
|                                 | Sepals                                     | Petals          | Stamens         | Carpels         |
| <b><i>Col</i> n=72</b>          | 4.00 $\pm$ 0.00                            | 4.00 $\pm$ 0.00 | 6.00 $\pm$ 0.00 | 2.00 $\pm$ 0.00 |
| <b><i>ptl-1</i> n=54</b>        | 4.00 $\pm$ 0.00                            | 2.31 $\pm$ 0.13 | 6.00 $\pm$ 0.00 | 2.00 $\pm$ 0.00 |
| <b><i>axr4-1</i> n=72</b>       | 4.00 $\pm$ 0.00                            | 3.90 $\pm$ 0.04 | 5.26 $\pm$ 0.10 | 2.00 $\pm$ 0.00 |
| <b><i>axr4-2</i> n=72</b>       | 4.00 $\pm$ 0.00                            | 3.93 $\pm$ 0.03 | 5.76 $\pm$ 0.06 | 2.00 $\pm$ 0.00 |
| <b><i>ptl-1 axr4-1</i> n=72</b> | 4.00 $\pm$ 0.00                            | 0.11 $\pm$ 0.04 | 5.57 $\pm$ 0.09 | 2.00 $\pm$ 0.00 |
| <b><i>ptl-1 axr4-2</i> n=63</b> | 4.00 $\pm$ 0.00                            | 0.16 $\pm$ 0.05 | 5.51 $\pm$ 0.11 | 2.00 $\pm$ 0.00 |

The first six flowers of the indicated number of plants (*n*) were scored

**Table S8. Mean number of floral organs per flower in single and double mutant combinations of *ptl-1* and *rbe-2*, or *aux1-7* and *rbe-2***

|                                         | Mean number organs per flower $\pm$ s.e.m. |                 |                 |                 |
|-----------------------------------------|--------------------------------------------|-----------------|-----------------|-----------------|
|                                         | Sepals                                     | Petals          | Stamens         | Carpels         |
| <b>Col <i>n</i>=72</b>                  | 4.00 $\pm$ 0.00                            | 4.00 $\pm$ 0.00 | 6.00 $\pm$ 0.00 | 2.00 $\pm$ 0.00 |
| <b><i>ptl-1</i> <i>n</i>=54</b>         | 4.00 $\pm$ 0.00                            | 2.31 $\pm$ 0.13 | 6.00 $\pm$ 0.00 | 2.00 $\pm$ 0.00 |
| <b><i>rbe-2</i> <i>n</i>=54</b>         | 4.00 $\pm$ 0.00                            | 2.02 $\pm$ 0.10 | 5.96 $\pm$ 0.03 | 2.00 $\pm$ 0.00 |
| <b><i>ptl-1 rbe-2</i> <i>n</i>=66</b>   | 4.00 $\pm$ 0.00                            | 2.22 $\pm$ 0.08 | 5.98 $\pm$ 0.02 | 2.00 $\pm$ 0.00 |
| <b><i>aux1-7</i> <i>n</i>=168</b>       | 4.00 $\pm$ 0.00                            | 3.96 $\pm$ 0.02 | 5.83 $\pm$ 0.04 | 2.00 $\pm$ 0.00 |
| <b><i>aux1-7 rbe-2</i> <i>n</i>=118</b> | 4.00 $\pm$ 0.00                            | 0.22 $\pm$ 0.04 | 5.88 $\pm$ 0.04 | 2.00 $\pm$ 0.00 |

The first six flowers of the indicated number of plants (*n*) were scored.

Table S9. Mean number of floral organs per flower in mutant combinations of *ptl* with *pin1*, *pid* or *pin1 aux1*

| Genotype<br>All <i>pmd-1d</i> except Col strains* | Number<br>of<br>flowers | Mean number organs per flower $\pm$ s.e.m. |                 |                 |
|---------------------------------------------------|-------------------------|--------------------------------------------|-----------------|-----------------|
|                                                   |                         | Sepals                                     | Petals          | Stamens         |
| <b><i>PIN-FORMED1</i></b>                         |                         |                                            |                 |                 |
| <b>Ler</b>                                        | 95                      | 4.00 $\pm$ 0.00                            | 4.00 $\pm$ 0.00 | 5.91 $\pm$ 0.00 |
| <b><i>ptl-3</i></b>                               | 85                      | 4.01 $\pm$ 0.01                            | 5.22 $\pm$ 0.14 | 5.99 $\pm$ 0.01 |
| <b><i>pin1-3</i></b>                              | 28                      | 8.11 $\pm$ 0.78                            | 7.39 $\pm$ 0.77 | 0.18 $\pm$ 0.16 |
| <b><i>ptl-3 pin1-3</i></b>                        | 16                      | 8.19 $\pm$ 1.32                            | 1.13 $\pm$ 0.41 | 1.31 $\pm$ 0.53 |
| <b><i>pin1-5</i></b>                              | 37                      | 5.45 $\pm$ 0.13                            | 6.43 $\pm$ 0.26 | 0.89 $\pm$ 0.15 |
| <b><i>ptl-3 pin1-5</i></b>                        | 30                      | 5.33 $\pm$ 0.14                            | 2.83 $\pm$ 0.18 | 2.43 $\pm$ 0.27 |
| <b><i>PINOID</i></b>                              |                         |                                            |                 |                 |
| <b><i>pid-1</i></b>                               | 43                      | 4.51 $\pm$ 0.15                            | 6.51 $\pm$ 0.27 | 2.65 $\pm$ 0.28 |
| <b><i>ptl-3 pid-1</i></b>                         | 86                      | 4.29 $\pm$ 0.10                            | 1.28 $\pm$ 0.15 | 4.18 $\pm$ 0.13 |
| <b>Col*</b>                                       | 25                      | 4.00 $\pm$ 0.00                            | 4.03 $\pm$ 0.03 | 5.93 $\pm$ 0.05 |
| <b><i>ptl-1*</i></b>                              | 25                      | 4.00 $\pm$ 0.00                            | 2.60 $\pm$ 0.20 | 6.00 $\pm$ 0.00 |
| <b><i>pid-3*</i></b>                              | 81                      | 5.22 $\pm$ 0.21                            | 7.47 $\pm$ 0.52 | 3.01 $\pm$ 0.35 |
| <b><i>ptl-1 pid-3*</i></b>                        | 69                      | 4.53 $\pm$ 0.18                            | 2.20 $\pm$ 0.31 | 5.10 $\pm$ 0.31 |
| <b><i>AUXIN1 PIN-FORMED1</i></b>                  |                         |                                            |                 |                 |
| <b><i>aux-n1</i></b>                              | 80                      | 4.00 $\pm$ 0.00                            | 3.95 $\pm$ 0.02 | 5.51 $\pm$ 0.08 |
| <b><i>aux1-n1 pin1-3</i></b>                      | 11                      | 6.00 $\pm$ 0.50                            | 7.55 $\pm$ 0.41 | 0.27 $\pm$ 0.19 |
| <b><i>aux1-n1 ptl-3</i></b>                       | 60                      | 4.02 $\pm$ 0.02                            | 0.78 $\pm$ 0.10 | 5.67 $\pm$ 0.07 |
| <b><i>aux1-n1 pin1-3 ptl-3</i></b>                | 12                      | 6.25 $\pm$ 0.30                            | 0.42 $\pm$ 0.19 | 0.67 $\pm$ 0.19 |
| <b><i>aux1-n1 pin1-5</i></b>                      | 45                      | 4.18 $\pm$ 0.11                            | 5.09 $\pm$ 0.21 | 0.71 $\pm$ 0.13 |
| <b><i>aux1-n1 pin1-5 ptl-3</i></b>                | 31                      | 4.48 $\pm$ 0.20                            | 0.06 $\pm$ 0.04 | 1.00 $\pm$ 0.18 |

\*PMD

Fourth whorl organs were severely disrupted in many genotypes; numbers were not scored.

**Table S10. Deduced genes lying between DNA markers F16M14-C1 and F16M14-C5.**

| Location          | Locus     | Gene Model    | Description                                                                                                      |
|-------------------|-----------|---------------|------------------------------------------------------------------------------------------------------------------|
| 15972993-15977180 | AT2G38120 | <i>AUX1</i>   | Auxin influx transporter.                                                                                        |
| 15978512-15980749 | AT2G38130 | <i>ATMAK3</i> | <i>Arabidopsis</i> homolog of the yeast protein MAK3, a component of the N-terminal acetyltransferase complex C. |
| 15980883-15981612 | AT2G38140 | <i>PSRP4</i>  | Plastid-specific ribosomal protein 4 (PSRP4) mRNA.                                                               |
| 15981700-15982917 | AT2G38150 | AT2G38150     | Putative transferase involved in transferring glycosyl groups.                                                   |
| 15986643-15988522 | AT2G38160 | AT2G38160     | Unknown protein (best <i>Arabidopsis</i> protein match is AT2G40070 (also an unknown protein)).                  |
| 15989083-15993276 | AT2G38170 | <i>CAX1</i>   | High affinity vacuolar calcium antiporter.                                                                       |
| 15997114-15998906 | AT2G38180 | AT2G38180     | GDSL-motif lipase/hydrolase family protein.                                                                      |

**Table S11. DNA primers used for positional cloning of *NOP***

| Primer Name    | Coordinates (kbp) | Sequence                          | Type | Notes                                   |
|----------------|-------------------|-----------------------------------|------|-----------------------------------------|
| CIW2 F         | 1,194,606         | 5'-CCCAAAGTTAATTATACTGT-3'        | SSLP | 15 bp deletion in Ler                   |
| CIW2 R         | 1,194,710         | 5'-CCGGGTTAATAATAAATGT-3'         |      |                                         |
| CIW3 F         | 6,402,846         | 5'-GAAACTCAATGAAATCCACTT-3'       | SSLP | 30 bp deletion in Ler                   |
| CIW3 R         | 6,403,081         | 5'-TGAACCTGTTGTGAGCTTTGA-3'       |      |                                         |
| F13M22 F       | 15,769,483        | 5'-TTCTTCTTGCTTAGCATGTTCTTG-3'    | SSLP | 12 bp deletion in Ler                   |
| F13M22 R       | 15,769,678        | 5'-CCCCTCCATTAGGATG-3'            |      |                                         |
| T8P21 F        | 15,829,952        | 5'-AACTTGGATTTATTGACATGATGTTT-3'  | SSLP | 9 bp deletion in Ler                    |
| T8P21 R        | 15,830,155        | 5'-CAGTAACATTGAAAAACAAAAGAC-3'    |      |                                         |
| F16M14 - C1 F  | 15,960,540        | 5'-ATGTTGGAAGCTGAGCCTGT-3'        | CAPS | <i>HincII</i> cleavage site lost in Ler |
| F16M14 - C1 R  | 15,960,789        | 5'-GGCAACTGTAGCCATTTGAA-3'        |      |                                         |
| F16M14 - III F | 15,989,704        | 5'-CAATGAACGTGAAGACCAAATG-3'      | SSLP | 10 bp deletion in Ler                   |
| F16M14 - III R | 15,989,908        | 5'-CGCCAAAACCGAAAAATAAC-3'        |      |                                         |
| F16M14 - C5 F  | 16,000,894        | 5'-TGTTGTCTTTGTATACTTCACATTGAT-3' | CAPS | <i>TspRI</i> cleavage site lost in Ler  |
| F16M14 - C5 R  | 16,001,135        | 5'-CTTCATCGACCACAAGCTGA-3'        |      |                                         |
| T19C21 F       | 16,102,876        | 5'-TGAATGCCTTTGCTCACAGT-3'        | SSLP | 19 bp deletion in Ler                   |
| T19C21 R       | 16,103,085        | 5'-GCCAGTCTTCCAATGCCTA-3'         |      |                                         |
| NGA168 F       | 16,291,841        | 5'-TCGTCTACTGCACTGCCG-3'          | SSLP | 16 bp deletion in Ler                   |
| NGA168 R       | 16,291,991        | 5'-GAGGACATGTATAGGAGCCTCG-3'      |      |                                         |
| T16B24 F       | 16,422,953        | 5'-TTGACACTTTCGCGTAGAAC-3'        | SSLP | 14 bp deletion in Ler                   |
| T16B24 R       | 16,423,101        | 5'-AAC AAGCTATTGGTGATGAACG-3'     |      |                                         |
